# Supplementary material for: Combustion induced synthesis of multicomponent Cu-based catalysts for autocatalytic CO hydrogenation to methanol in a three-phase reactor system
Source: Royal Society of Chemistry journal article supplement (doi:10.1039/d2re00427e), 2022-11-09
Supplement: d2re00427e1.pdf [file d2re00427e1.pdf]

## Combustion Induced Synthesis of Multicomponent Cu-Based Catalysts for autocatalytic CO Hydrogenation to Methanol in Three-Phase Reactor System

Vaibhav Pandey<sup>a</sup>, Kamal K. Pant<sup>a\*</sup>, Sreedevi Upadhyayula<sup>a</sup>,

<sup>a</sup>Department of Chemical Engineering, Indian Institute of Technology Delhi, 110016, India

\*Corresponding Author: [kkpant@chemical.iitd.ac.in](mailto:kkpant@chemical.iitd.ac.in)

### Supplementary Information

#### Catalyst synthesis:

Catalysts were synthesized by the solvent combustion method using citric acid as organic fuel and adopted from Yao et al <sup>1</sup>. Typically, CuZn, CuMg, and CuZnMg catalysts were prepared from citric acid monohydrate, Copper nitrate trihydrate, zinc nitrate hexahydrate, and magnesium nitrate. The molar ratio of citric acid: (Cu + (Zn or Mg)) = 2 and the weight ratio of (Cu-Zn-Mg + citric acid)/water = 2. The homogeneous aqueous solution was obtained by stirring the initial mixture followed by heating for 2 hours at 50 °C to obtain a citric acid-based slurry. The slurry was heated overnight at 110 °C followed by combustion in a muffle furnace at 350 °C for 4 h to produce combusted carbon-free powder. Typically, the molar ratio of Cu: metal oxide is 3:2.

#### Activity test:

CO hydrogenation reaction was carried out in a stirred tank slurry reactor with 300 ml volume in continuous mode with a typical 5-weight % slurry concentration in diglyme solvent. The typical reactor schematic is shown in Figure S1. The catalyst was reduced in a hydrogen flow of 50 mL/min at 15 bar and 250 °C for 6 hours at 400 rpm stirring speed. The reactor was cooled to ambient temperature and purged with syngas (CO/H<sub>2</sub> = 0.5) and pressurized up to required pressures at a gas flow rate of 100 sccm (WHSV = 2564  $ml\ g_{cat}^{-1}h^{-1}$ ). The reactor was heated to 220-280 °C while maintaining the pressure at 30-50 bar using a back pressure regulator. The stirrer speed is maintained at 1000 rpm to eliminate the

external mass transfer limitations. The effluent gaseous products were analyzed using a Gas Chromatograph (Agilent technologies 8860 GC) equipped with flame ionization (FID) and thermal conductivity detectors (TCD) in the porapack-Q column and liquid products were analyzed by ALS equipped Gas Chromatograph (Agilent Technologies 7820A GC) equipped with flame ionization detector (FID) and DB-waxtr column.

The syngas conversion and product selectivity were calculated from the following relationships:

$$\% \text{ CO conversion } (X_{CO}) = \frac{CO_{in} - CO_{out}}{CO_{in}} \times 100\%$$

$$\% \text{ Selectivity}_p = \frac{\text{Total moles of methanol formed}}{CO_{in} - CO_{out}} \times 100\%$$

$$STY (g_{CH_3OH} kg_{cat}^{-1} h^{-1}) = \frac{F_{CO} * X_{CO} * S_{CH_3OH} * M_{CH_3OH}}{22400 * W_{cat}}$$

$F_{CO}$  = Flowrate of  $CO_{in}$  (mL/h),  $X_{CO}$  = CO Conversion,  $S_{CH_3OH}$  = Methanol Selectivity

$W_{cat}$  = Catalyst Weight,  $M_{CH_3OH}$  = Molecular weight of methanol

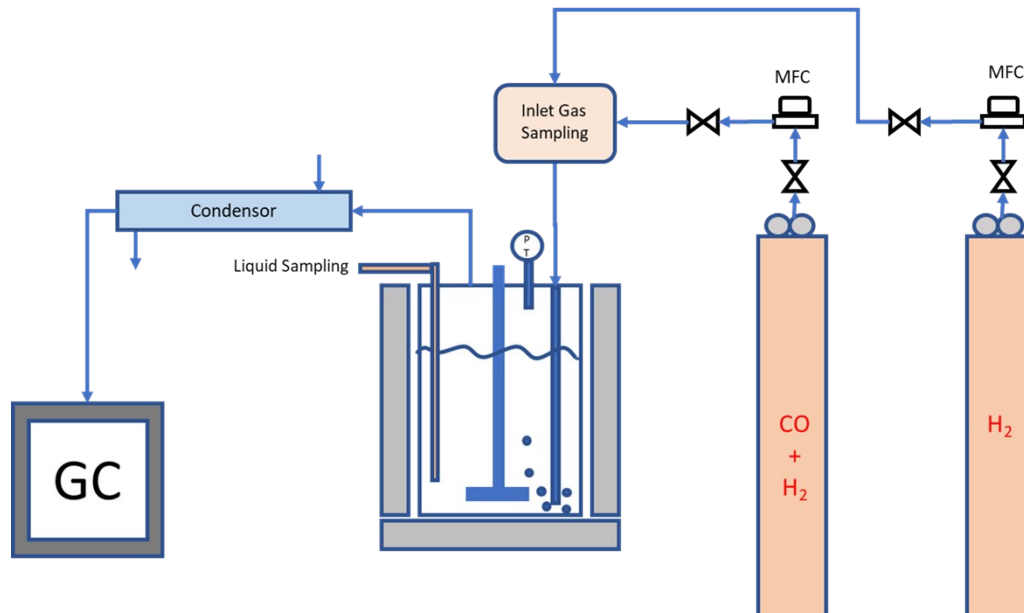

**Figure S1: Schematic diagram of stirred tank slurry reactor set-up for methanol synthesis from syngas.**

### **Characterization:**

The XRD pattern of catalysts was recorded within the range of 20° to 80° on Rigaku Miniflex 600 using Cu K $\alpha$  radiation with a scan speed of 4°/min with a step width of 0.02°. The crystallite size was calculated using the Scherrer equation.

The surface area was determined by N<sub>2</sub> physisorption at 77K using Quantachrome Autosorb (IQ-C-XR-AG) surface area analyzer. The sample was degassed at 473K for 2 hours before analysis. The surface area and pore size distribution were analyzed by Brunauer-Emmett-Teller (BET) method and Non-linear Density Function Theory (NLDFT) method, respectively.

H<sub>2</sub>-TPR experiments were carried out in Quantachrome Autosorb (IQ-C-XR-AG) instrument. The calcined catalysts (~40mg) were outgassed for 2 h at 200 °C in argon flow (30mL/min). The H<sub>2</sub>-TPR was carried out from 100 °C to 800 °C at the ramp rate of 10 °C/min with an H<sub>2</sub> (10.2 vol% H<sub>2</sub>) flow of 30 mL/min and a TCD detector was used to calculate the hydrogen consumption and plotted against temperature.

The CO<sub>2</sub> TPD and H<sub>2</sub>-TPD were performed in the Quantachrome Autosorb (IQ-C-XR-AG) instrument and followed the same procedure of pre-treatment. The calcined catalysts (~100mg) were reduced *in-situ* at 400 °C for 2 h in the flow of 10.2% H<sub>2</sub> followed by 5.1% CO<sub>2</sub> and 10.2% H<sub>2</sub> adsorption at 80 °C for 60 min. After He purges for 30 min, the desorption profile of H<sub>2</sub> and CO<sub>2</sub> was recorded from 40°C to 850°C at 10°C/min with the TCD.

The surface morphology of combusted catalysts was analyzed by the FESEM instrument of JEOL (7800F Prime). HR-TEM images of the combusted catalysts were acquired by using an FEI TecnaiTF20 microscope. The surface chemical states of the catalysts were studied by X-ray photoelectron spectroscopy (XPS) on PHI 5000 Versa Probe III with an Al K $\alpha$ .

The copper (Cu<sup>0</sup>) surface area (S<sub>c</sub>) and dispersion was analyzed by the nitrous oxide (N<sub>2</sub>O) pulse method. The catalysts were first reduced at 400 °C for 2h with 10.2%H<sub>2</sub> followed by

purging with He for 1 h and cooled down to 40 °C. The catalysts were then exposed to 10% N<sub>2</sub>O for 2 h to oxidize surface Cu atoms to Cu<sub>2</sub>O. After cooling to room temperature, the temperature-programmed reduction (TPR) was performed with 10.2% H<sub>2</sub> flow to reduce the Cu<sub>2</sub>O to Cu<sup>0</sup> at 10 °C /min ramp rate to 700 °C. The dispersion, Cu surface area, and particle size were calculated from the amount of H<sub>2</sub> consumed during the TPR step by assuming that Cu crystallites are spherical in nature. The dispersion of Cu, copper surface area (S<sub>c</sub>), and particle size were calculated from the following equations (SE6, SE7, and SE8).

### **Computational Details:**

All computations were done in Dessault Systems' Materials Studio using the Dmol<sup>3</sup> program package. DFT <sup>2</sup> was used with Perdew-Wang-91 (PW-91) [27] and generalized gradient approximation (GGA) exchange-correlation function with unrestricted spin polarization. PW-91 functional is reliable for this calculation system, according to previous reports <sup>45</sup>. Double numerical basis with polarization (DNP) was used for all atoms in the adsorbed and substrate system <sup>6</sup>. Effective core potentials (ECP) are used for ZnO and MgO atoms <sup>7</sup>. The convergence criterion judged by energy, force, and displacement are  $1 \times 10^{-5}$  Ha, 0.002 Ha/Å, and 0.005 Å respectively. The Monkhorst–Pack grid of  $4 \times 4 \times 1$  <sup>8</sup> and Methfessel–Paxton smearing of 0.01 Hartree (Ha) were used in the k-point sampling approach. The electronic structures were obtained by solving the Kohn-Sham equation <sup>9,10</sup>.

The estimated lattice constant of bulk ZnO and MgO was 3.249 Å and 4.211 Å which is in the agreement with the experimental value of 3.25 Å <sup>11</sup> and 4.19 Å <sup>12</sup> respectively. A good agreement was found between our computed data and experimental data. MgO (200) and ZnO (101) facet was cleaved from the optimization bulk using 5 layered p(2×2) supercell and vacuum region of 20 Å was used to model 0.20 monolayer (ML) coverage. In optimized 5 layered supercell the top three layers were relaxed, whereas the bottom two layers were fixed, and the volume remained constant.

Adsorption energy was calculated in vacuum by:

$$\Delta E_{\text{ads}} = E_{\text{surface/adsorbent}} - (E_{\text{surface}} + E_{\text{adsorbent}}) \quad (\text{SE1})$$

### Calculation of the dimensionless number (Su)

The dimensionless suspension number to assess the degree of the catalyst dispersion in the solvent was calculated as follows <sup>13</sup>

$$Su = \frac{\rho_{\text{liq}} n^3 \cdot d_R^5}{\varphi_v (\rho_{\text{cat}} - \rho_{\text{liq}}) \cdot g \cdot w_{ss}} \quad (\text{SE2})$$

Where  $\rho_{\text{cat}}$  and  $\rho_{\text{liq}}$  are the density of the solvent and catalyst, respectively, n is the stirrer speed, dR is the diameter of the stirrer bar,  $\varphi_v$  is the vol/vol of catalyst and suspension, g is the acceleration of the gravity and  $w_{ss}$  is the sedimentation of swarm particles.

the sedimentation of swarm particles

$$w_{ss} = \sqrt{\frac{4}{3} \cdot \left( \frac{\rho_{\text{cat}}}{\rho_{\text{liq}}} - 1 \right) \cdot \frac{g \cdot d_{\text{cat}}}{C_D}} \quad (\text{SE3})$$

the drag coefficient CD is a function of Reynolds number (Re)

$$Re = \frac{w_{ss} \cdot \rho_{\text{liq}} \cdot d_{\text{cat}}}{\eta_{\text{liq}}} \quad (\text{SE4})$$

$$CD = \frac{24}{Re} + \frac{4}{Re^{0.5}} + 0.4 \quad (\text{Valid for } 0 < Re < 1.5 \times 10^{-5}) \quad (\text{SE5})$$

Table S1: the suspension number and stirrer speed of the catalysts

| Catalysts | Suspension Number (Su)       |                               |                               |
|-----------|------------------------------|-------------------------------|-------------------------------|
|           | 300 rpm ( $\times 10^{-5}$ ) | 1000 rpm ( $\times 10^{-5}$ ) | 1500 rpm ( $\times 10^{-5}$ ) |
| CuZn      | 1.328                        | 49.21                         | 166                           |
| CuMg      | 5.724                        | 212                           | 715.5                         |
| CuZnMg    | 2.932                        | 108.6                         | 366.5                         |

### Calculation of the Cu dispersion, Cu<sup>0</sup> surface area, and particle size

The dispersion of Cu and copper surface area ( $S_{Cu}$ ) was calculated from the equations (SE6) and (SE7):

$$D = \frac{\left(\frac{2n_{H_2} \times M_{Cu}}{W}\right) \times 100\%}{X} \times 100\% \quad (\text{SE6})$$

$$S_{Cu} = \frac{2n_{H_2} \times N}{1.4 \times 10^{19} \times W} (m^2 g^{-1}) \quad (\text{SE7})$$

where  $n_{H_2}$  is the molar number of consumed  $H_2$ ,  $D$  is the dispersion of Cu,  $M_{Cu}$  is the relative atomic mass ( $63.546 \text{ g mol}^{-1}$ ),  $W$  is the weight of the catalyst, and  $X$  is the stoichiometric composition of Cu (wt.%);  $S_{Cu}$  is the exposed copper surface area per gram catalyst,  $N$  is Avogadro's constant ( $6.02 \times 10^{23} \text{ atoms mol}^{-1}$ ), and  $1.4 \times 10^{19}$  is the number of copper atoms per square meter.

The mean Cu particle size is defined, by the following equation when the particles are hemispherical in shape.

$$d_p = \frac{6 * M}{D * \rho_{Cu} * \sigma * N_A} \quad (\text{SE8})$$

Where  $M$  is the molecular weight of Cu ( $63.546 \text{ g mol}^{-1}$ )  
 $D$  is the Cu fractional dispersion obtained as explained above  
 $\rho$  is the Cu metal density ( $8.94 \text{ g cm}^{-3}$ ),  
 $\sigma$  is the area occupied by a surface Cu atom ( $6.85 \text{ \AA}^2$  per atom),  
and  $N_A$  is the Avogadro constant

The d-band center is calculated by:

$$\varepsilon_d = \frac{\int_{-\infty}^{\infty} E \rho_d(E) d\varepsilon}{\int_{-\infty}^{\infty} \rho_d(E) d\varepsilon} \quad (\text{SE9})$$

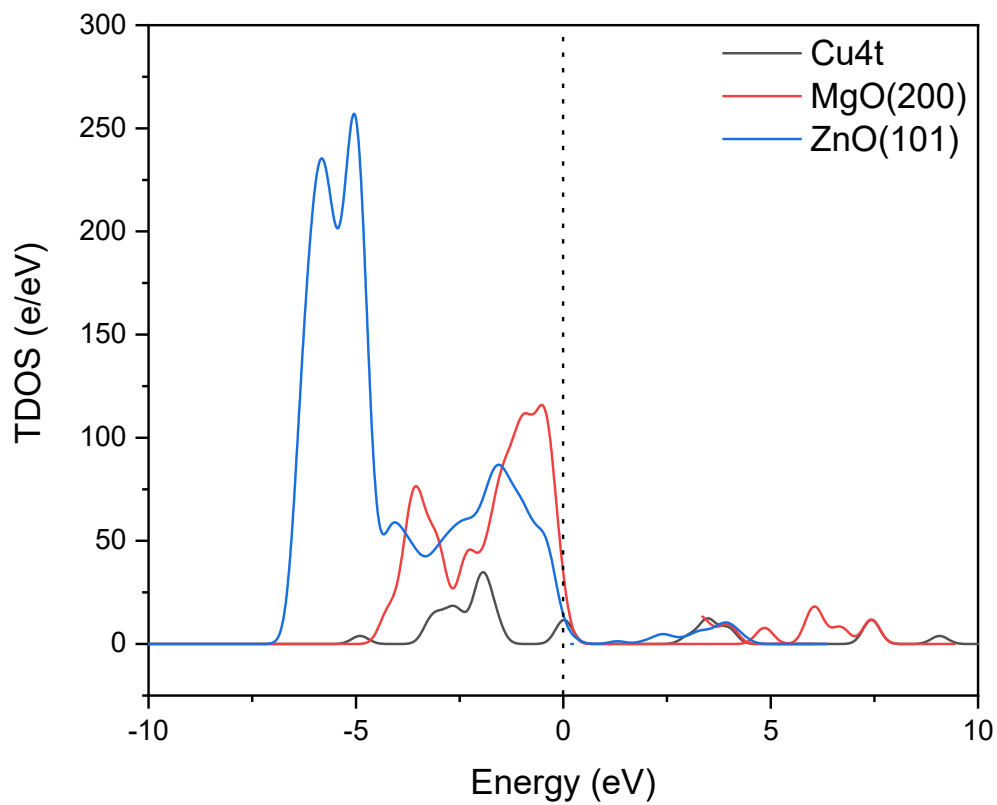

**Figure S2: Total density of states (TDOS) of Cu<sub>4t</sub>, MgO(200), and ZnO(101). The Fermi level is set to zero.**

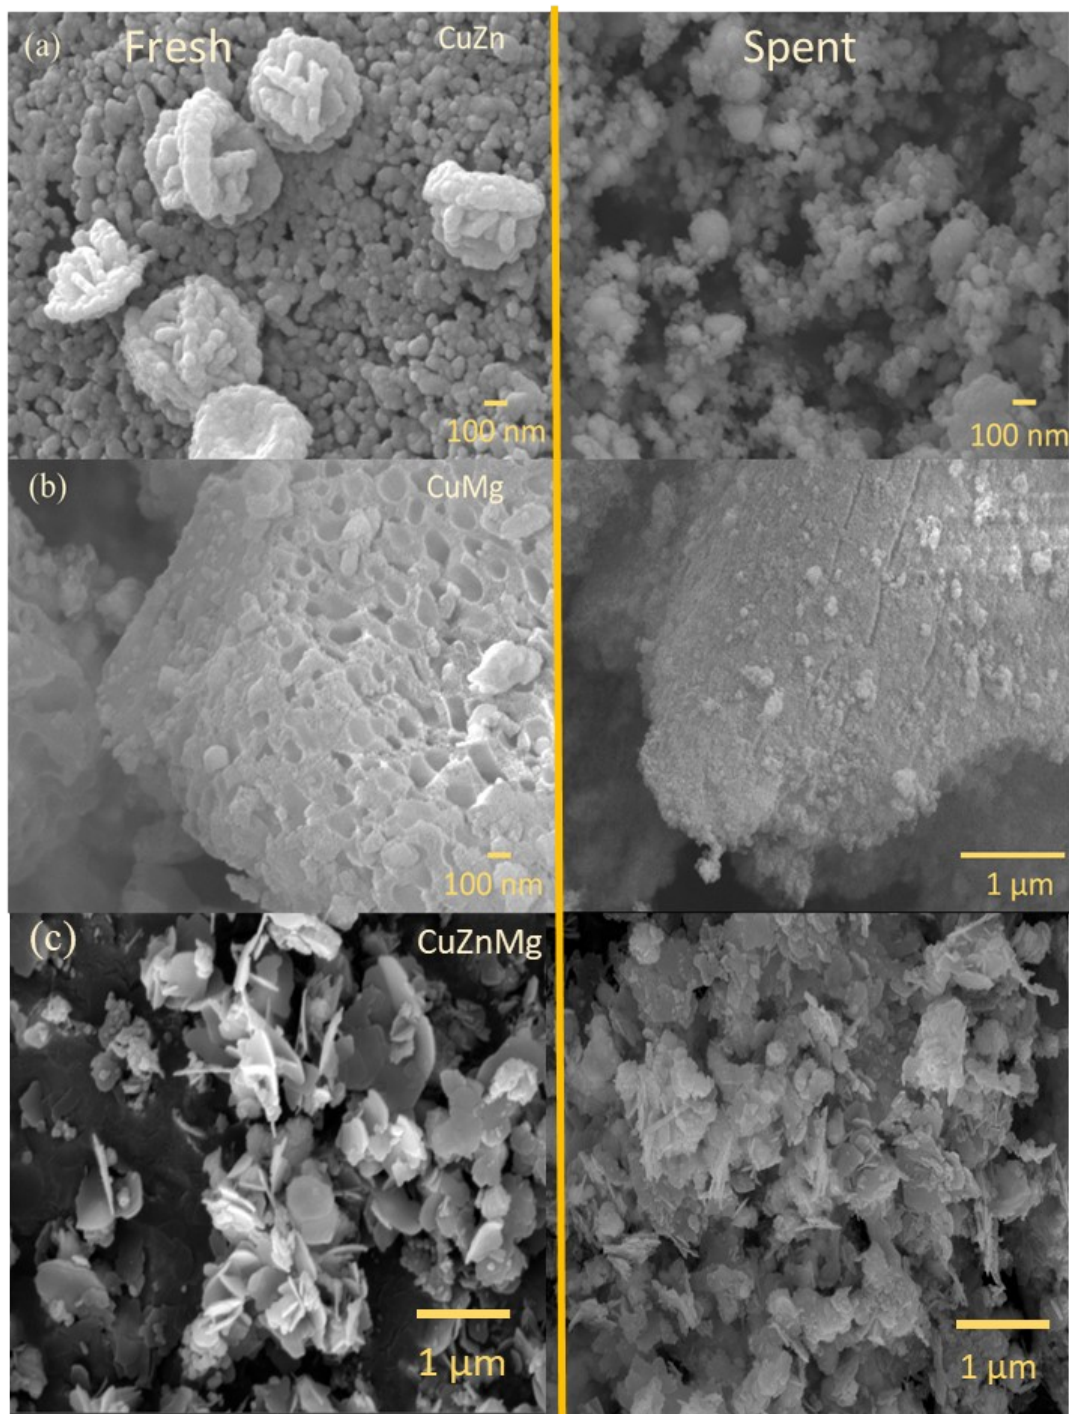

**Figure S3: SEM images of the fresh and spent catalyst (a) CuZn, (b) CuMg, (c) CuZnMg**



## References

- 1 B. Yao, T. Xiao, O. A. Makgae, X. Jie, S. Gonzalez-Cortes, S. Guan, A. I. Kirkland, J. R. Dilworth, H. A. Al-Megren, S. M. Alshihri, P. J. Dobson, G. P. Owen, J. M. Thomas and P. P. Edwards, *Nat. Commun.*, 2020, 11, 6395
- 2 B. Delley, *J. Chem. Phys.*, 1990, **92**, 508–517.
- 3 J. P. Perdew and Y. Wang, *Phys. Rev. B*, 1992, **45**, 13244–13249.
- 4 Z. Jiang and T. Fang, *Appl. Surf. Sci.*, 2016, **376**, 219–226.
- 5 W. H. Jiao, S. Z. Liu, Z. J. Zuo, R. P. Ren, Z. H. Gao and W. Huang, *Appl. Surf. Sci.*, 2016, **387**, 58–65.
- 6 Y. Inada and H. Orita, *J. Comput. Chem.*, 2008, **29**, 225–232.
- 7 R. Zhang, L. Ling, B. Wang and W. Huang, *Appl. Surf. Sci.*, 2010, **256**, 6717–6722.
- 8 Z. Zuo, L. L. Sun, W. Huang, P. Han and Z. Li, *Appl. Catal. A Gen.*, 2010, **375**, 181–187.
- 9 M. Dolg, W. Liu and S. Kalvoda, *Int. J. Quantum Chem.*, 2000, **76**, 359–370.
- 10 Hohenberg, P.; Kohn, W. *Phys. Rev.* 1964, 136, B864–B871
- 11 H. Algarni, A. Gueddim, N. Bouarissa, M. A. Khan and H. Ziani, *Results Phys.*, 2019, **15**, 102694.
- 12 M. I. McCarthy and N. M. Harrison, *Phys. Rev. B*, 1994, **49**, 8574–8582.
- 13 P. Schühle, S. Reichenberger, G. Marzun and J. Albert, *Chemie-*

*Ingenieur-Technik*, 2021, **93**, 585–593.
